# Supplementary material
Source: publisher figshare collection journal article supplement (https://sage.figshare.com/ndownloader/files/21599433)
Supplement: Supplementary file 1 [file 21599433]

# **Journal of Health and Social Behavior**

OFFICIAL JOURNAL OF THE AMERICAN SOCIOLOGICAL ASSOCIATION

**ONLINE SUPPLEMENT**

**to article  
in**

Journal of Health and Social Behavior, 2020, Vol. 61, Issue 1

**Striving While Black: Race and the Psychophysiology of Goal Pursuit**

**Reed T. DeAngelis**

*University of North Carolina at Chapel Hill*

**Table S1.** Robust linear regression estimates of self-esteem (n=1,252).

|                                | (1)   |        |     | (2)   |        |     | (3)   |        |     | (4)   |        |     |
|--------------------------------|-------|--------|-----|-------|--------|-----|-------|--------|-----|-------|--------|-----|
| Focal Variables                |       |        |     |       |        |     |       |        |     |       |        |     |
| Black                          | .138  | (.033) | *** | .180  | (.036) | *** | .035  | (.053) |     | .100  | (.056) |     |
| GSS (scale)                    | -.020 | (.003) | *** | -.014 | (.003) | *** |       |        |     |       |        |     |
| Low (reference)                |       |        |     |       |        |     |       |        |     |       |        |     |
| Middle                         |       |        |     |       |        |     | -.165 | (.056) | **  | -.132 | (.053) | *   |
| High                           |       |        |     |       |        |     | -.496 | (.062) | *** | -.323 | (.070) | *** |
| Interactions [Black ×...]      |       |        |     |       |        |     |       |        |     |       |        |     |
| GSS (scale)                    | .012  | (.004) | **  | .011  | (.004) | **  |       |        |     |       |        |     |
| Low (reference)                |       |        |     |       |        |     |       |        |     |       |        |     |
| Middle                         |       |        |     |       |        |     | .059  | (.078) |     | .051  | (.076) |     |
| High                           |       |        |     |       |        |     | .246  | (.087) | **  | .179  | (.083) | *   |
| Covariates                     |       |        |     |       |        |     |       |        |     |       |        |     |
| Age                            |       |        |     | .000  | (.002) |     |       |        |     | -.001 | (.002) |     |
| Female                         |       |        |     | .030  | (.037) |     |       |        |     | .025  | (.036) |     |
| Childhood financial hardship   |       |        |     | -.029 | (.023) |     |       |        |     | -.029 | (.023) |     |
| Parental education             |       |        |     | .000  | (.010) |     |       |        |     | -.001 | (.010) |     |
| Major life events              |       |        |     | .008  | (.005) |     |       |        |     | .008  | (.005) |     |
| Lifetime psychiatric disorders |       |        |     | -.093 | (.028) | **  |       |        |     | -.100 | (.028) | *** |
| Married                        |       |        |     | -.021 | (.039) |     |       |        |     | -.022 | (.038) |     |
| Education                      |       |        |     | .004  | (.008) |     |       |        |     | .005  | (.008) |     |
| Financial resources            |       |        |     | .078  | (.027) | **  |       |        |     | .075  | (.028) | **  |
| Employed full-time             |       |        |     | .189  | (.073) | *   |       |        |     | .214  | (.075) | **  |
| Employed part-time             |       |        |     | .043  | (.100) |     |       |        |     | .062  | (.099) |     |
| Retired                        |       |        |     | .175  | (.089) |     |       |        |     | .183  | (.088) | *   |
| Other employment status        |       |        |     | .031  | (.100) |     |       |        |     | .051  | (.102) |     |
| Major discrimination           |       |        |     | -.005 | (.016) |     |       |        |     | -.006 | (.016) |     |
| Daily discrimination           |       |        |     | -.135 | (.038) | **  |       |        |     | -.134 | (.038) | **  |
| Obese                          |       |        |     | -.020 | (.040) |     |       |        |     | -.009 | (.041) |     |
| Smoker                         |       |        |     | .085  | (.054) |     |       |        |     | .062  | (.052) |     |
| Heavy drinker                  |       |        |     | -.094 | (.055) |     |       |        |     | -.119 | (.055) | *   |
| Intercept                      | 4.522 | (.026) | *** | 4.659 | (.202) | *** | 4.760 | (.029) | *** | 4.841 | (.211) | *** |
| Adjusted R-squared             | .122  |        |     | .198  |        |     | .099  |        |     | .187  |        |     |

Notes: Unstandardized coefficients are reported with robust standard errors in parentheses. All estimates adjust for post-stratification weighting and clustering at the census block group level. GSS=goal-striving stress. Scaled GSS scores are mean-centered.

\* $p < .05$ , \*\* $p < .01$ , \*\*\* $p < .001$  (two-tailed).

**Table S2.** Robust linear regression estimates of John Henryism (n=1,252).

|                                | (1)    |        |     | (2)    |         |     | (3)    |         |     | (4)    |         |     |
|--------------------------------|--------|--------|-----|--------|---------|-----|--------|---------|-----|--------|---------|-----|
| Focal Variables                |        |        |     |        |         |     |        |         |     |        |         |     |
| Black                          | 1.782  | (.315) | *** | 1.209  | (.397)  | **  | .928   | (.672)  |     | .170   | (.821)  |     |
| GSS (scale)                    | -.117  | (.027) | *** | -.097  | (.030)  | **  |        |         |     |        |         |     |
| Low (reference)                |        |        |     |        |         |     |        |         |     |        |         |     |
| Middle                         |        |        |     |        |         |     | -.597  | (.510)  |     | -.658  | (.566)  |     |
| High                           |        |        |     |        |         |     | -3.036 | (.639)  | *** | -2.654 | (.753)  | **  |
| Interactions [Black ×...]      |        |        |     |        |         |     |        |         |     |        |         |     |
| GSS (scale)                    | .091   | (.042) | *   | .093   | (.043)  | *   |        |         |     |        |         |     |
| Low (reference)                |        |        |     |        |         |     |        |         |     |        |         |     |
| Middle                         |        |        |     |        |         |     | .965   | (1.052) |     | 1.276  | (1.104) |     |
| High                           |        |        |     |        |         |     | 1.507  | (.985)  |     | 1.517  | (1.080) |     |
| Covariates                     |        |        |     |        |         |     |        |         |     |        |         |     |
| Age                            |        |        |     | -.013  | (.021)  |     |        |         |     | -.015  | (.021)  |     |
| Female                         |        |        |     | .740   | (.462)  |     |        |         |     | .686   | (.457)  |     |
| Childhood financial hardship   |        |        |     | -.583  | (.231)  | *   |        |         |     | -.579  | (.235)  | *   |
| Parental education             |        |        |     | -.083  | (.091)  |     |        |         |     | -.090  | (.090)  |     |
| Major life events              |        |        |     | .146   | (.046)  | **  |        |         |     | .136   | (.045)  | **  |
| Lifetime psychiatric disorders |        |        |     | -.902  | (.312)  | **  |        |         |     | -.898  | (.308)  | **  |
| Married                        |        |        |     | .103   | (.544)  |     |        |         |     | .135   | (.527)  |     |
| Education                      |        |        |     | -.070  | (.087)  |     |        |         |     | -.066  | (.085)  |     |
| Financial resources            |        |        |     | .034   | (.348)  |     |        |         |     | -.049  | (.352)  |     |
| Employed full-time             |        |        |     | 1.291  | (.596)  | *   |        |         |     | 1.416  | (.603)  | *   |
| Employed part-time             |        |        |     | .411   | (.878)  |     |        |         |     | .572   | (.863)  |     |
| Retired                        |        |        |     | 1.232  | (1.154) |     |        |         |     | 1.259  | (1.175) |     |
| Other employment status        |        |        |     | -.195  | (1.247) |     |        |         |     | -.071  | (1.178) |     |
| Major discrimination           |        |        |     | .210   | (.224)  |     |        |         |     | .248   | (.227)  |     |
| Daily discrimination           |        |        |     | -.668  | (.373)  |     |        |         |     | -.608  | (.372)  |     |
| Obese                          |        |        |     | -.001  | (.390)  |     |        |         |     | .080   | (.389)  |     |
| Smoker                         |        |        |     | .958   | (.505)  |     |        |         |     | .829   | (.503)  |     |
| Heavy drinker                  |        |        |     | -1.878 | (.835)  | *   |        |         |     | -2.158 | (.824)  | **  |
| Intercept                      | 47.480 | (.215) | *** | 50.330 | (2.041) | *** | 48.770 | (.384)  | *** | 51.438 | (2.172) | *** |
| Adjusted R-squared             | .051   |        |     | .094   |         |     | .054   |         |     | .098   |         |     |

Notes: Unstandardized coefficients are reported with robust standard errors in parentheses. All estimates adjust for post-stratification weighting and clustering at the census block group level. GSS=goal-striving stress. Scaled GSS scores are mean-centered.

\* $p < .05$ , \*\* $p < .01$ , \*\*\* $p < .001$  (two-tailed).

**Table S3.** Robust linear regression estimates of depressive symptoms (n=1,252).

|                                | (1)   |        |     | (2)   |        |     | (3)   |        |     | (4)   |        |     |
|--------------------------------|-------|--------|-----|-------|--------|-----|-------|--------|-----|-------|--------|-----|
| Focal Variables                |       |        |     |       |        |     |       |        |     |       |        |     |
| Black                          | .035  | (.037) |     | -.007 | (.034) |     | .115  | (.054) | *   | .066  | (.048) |     |
| GSS (scale)                    | .025  | (.002) | *** | .016  | (.002) | *** |       |        |     |       |        |     |
| Low (reference)                |       |        |     |       |        |     |       |        |     |       |        |     |
| Middle                         |       |        |     |       |        |     | .190  | (.037) | *** | .143  | (.040) | *** |
| High                           |       |        |     |       |        |     | .582  | (.048) | *** | .362  | (.053) | *** |
| Interactions [Black ×...]      |       |        |     |       |        |     |       |        |     |       |        |     |
| GSS (scale)                    | -.011 | (.003) | *** | -.010 | (.002) | *** |       |        |     |       |        |     |
| Low (reference)                |       |        |     |       |        |     |       |        |     |       |        |     |
| Middle                         |       |        |     |       |        |     | -.070 | (.071) |     | -.074 | (.062) |     |
| High                           |       |        |     |       |        |     | -.176 | (.081) | *   | -.135 | (.065) | *   |
| Covariates                     |       |        |     |       |        |     |       |        |     |       |        |     |
| Age                            |       |        |     | .001  | (.001) |     |       |        |     | .001  | (.001) |     |
| Female                         |       |        |     | .074  | (.033) | *   |       |        |     | .079  | (.033) | *   |
| Childhood financial hardship   |       |        |     | .008  | (.016) |     |       |        |     | .008  | (.017) |     |
| Parental education             |       |        |     | .014  | (.006) | *   |       |        |     | .015  | (.007) | *   |
| Major life events              |       |        |     | .005  | (.003) |     |       |        |     | .006  | (.003) |     |
| Lifetime psychiatric disorders |       |        |     | .123  | (.017) | *** |       |        |     | .132  | (.017) | *** |
| Married                        |       |        |     | .006  | (.031) |     |       |        |     | .007  | (.032) |     |
| Education                      |       |        |     | .000  | (.007) |     |       |        |     | -.001 | (.007) |     |
| Financial resources            |       |        |     | -.057 | (.026) | *   |       |        |     | -.055 | (.027) | *   |
| Employed full-time             |       |        |     | -.133 | (.039) | **  |       |        |     | -.165 | (.042) | *** |
| Employed part-time             |       |        |     | -.061 | (.055) |     |       |        |     | -.087 | (.057) |     |
| Retired                        |       |        |     | -.157 | (.063) | *   |       |        |     | -.167 | (.069) | *   |
| Other employment status        |       |        |     | .083  | (.062) |     |       |        |     | .055  | (.066) |     |
| Major discrimination           |       |        |     | .011  | (.014) |     |       |        |     | .012  | (.014) |     |
| Daily discrimination           |       |        |     | .226  | (.032) | *** |       |        |     | .225  | (.032) | *** |
| Obese                          |       |        |     | -.013 | (.028) |     |       |        |     | -.027 | (.029) |     |
| Smoker                         |       |        |     | .015  | (.038) |     |       |        |     | .039  | (.037) |     |
| Heavy drinker                  |       |        |     | .034  | (.046) |     |       |        |     | .066  | (.046) |     |
| Intercept                      | 1.671 | (.019) | *** | 1.012 | (.143) | *** | 1.393 | (.024) | *** | .816  | (.150) | *** |
| Adjusted R-squared             | .245  |        |     | .448  |        |     | .187  |        |     | .428  |        |     |

Notes: Unstandardized coefficients are reported with robust standard errors in parentheses. All estimates adjust for post-stratification weighting and clustering at the census block group level. GSS=goal-striving stress. Scaled GSS scores are mean-centered.

\* $p < .05$ , \*\* $p < .01$ , \*\*\* $p < .001$  (two-tailed).

**Table S4.** Robust linear regression estimates of anxiety (n=1,252).

|                                | (1)   |        |     | (2)   |        |     | (3)   |        |     | (4)   |        |     |
|--------------------------------|-------|--------|-----|-------|--------|-----|-------|--------|-----|-------|--------|-----|
| Focal Variables                |       |        |     |       |        |     |       |        |     |       |        |     |
| Black                          | -.109 | (.050) | *   | -.103 | (.050) | *   | .046  | (.076) |     | .075  | (.075) |     |
| GSS (scale)                    | .028  | (.003) | *** | .019  | (.003) | *** |       |        |     |       |        |     |
| Low (reference)                |       |        |     |       |        |     |       |        |     |       |        |     |
| Middle                         |       |        |     |       |        |     | .348  | (.058) | *** | .255  | (.055) | *** |
| High                           |       |        |     |       |        |     | .717  | (.070) | *** | .460  | (.069) | *** |
| Interactions [Black ×...]      |       |        |     |       |        |     |       |        |     |       |        |     |
| GSS (scale)                    | -.014 | (.004) | *** | -.013 | (.003) | *** |       |        |     |       |        |     |
| Low (reference)                |       |        |     |       |        |     |       |        |     |       |        |     |
| Middle                         |       |        |     |       |        |     | -.161 | (.112) |     | -.195 | (.100) |     |
| High                           |       |        |     |       |        |     | -.296 | (.139) | *   | -.288 | (.107) | **  |
| Covariates                     |       |        |     |       |        |     |       |        |     |       |        |     |
| Age                            |       |        |     | -.006 | (.002) | *   |       |        |     | -.005 | (.002) | *   |
| Female                         |       |        |     | .089  | (.049) |     |       |        |     | .097  | (.048) | *   |
| Childhood financial hardship   |       |        |     | .003  | (.025) |     |       |        |     | .003  | (.026) |     |
| Parental education             |       |        |     | .016  | (.009) |     |       |        |     | .017  | (.009) | *   |
| Major life events              |       |        |     | .014  | (.005) | **  |       |        |     | .015  | (.005) | **  |
| Lifetime psychiatric disorders |       |        |     | .163  | (.022) | *** |       |        |     | .174  | (.023) | *** |
| Married                        |       |        |     | .055  | (.042) |     |       |        |     | .059  | (.043) |     |
| Education                      |       |        |     | .023  | (.009) | **  |       |        |     | .022  | (.008) | **  |
| Financial resources            |       |        |     | -.077 | (.035) | *   |       |        |     | -.069 | (.034) | *   |
| Employed full-time             |       |        |     | -.066 | (.058) |     |       |        |     | -.108 | (.061) |     |
| Employed part-time             |       |        |     | -.094 | (.089) |     |       |        |     | -.119 | (.086) |     |
| Retired                        |       |        |     | -.158 | (.096) |     |       |        |     | -.170 | (.097) |     |
| Other employment status        |       |        |     | .190  | (.107) |     |       |        |     | .164  | (.112) |     |
| Major discrimination           |       |        |     | -.020 | (.016) |     |       |        |     | -.018 | (.017) |     |
| Daily discrimination           |       |        |     | .263  | (.041) | *** |       |        |     | .263  | (.041) | *** |
| Obese                          |       |        |     | -.030 | (.047) |     |       |        |     | -.044 | (.046) |     |
| Smoker                         |       |        |     | -.040 | (.058) |     |       |        |     | -.010 | (.059) |     |
| Heavy drinker                  |       |        |     | .064  | (.073) |     |       |        |     | .101  | (.081) |     |
| Intercept                      | 1.933 | (.025) | *** | .997  | (.217) | *** | 1.548 | (.040) | *** | .702  | (.220) | **  |
| Adjusted R-squared             | .156  |        |     | .334  |        |     | .130  |        |     | .322  |        |     |

Notes: Unstandardized coefficients are reported with robust standard errors in parentheses. All estimates adjust for post-stratification weighting and clustering at the census block group level. GSS=goal-striving stress. Scaled GSS scores are mean-centered.

\* $p < .05$ , \*\* $p < .01$ , \*\*\* $p < .001$  (two-tailed).

**Table S5.** Robust linear regression estimates of 12-hour urinary cortisol (n=1,252).

|                                   | (1)   |        |     | (2)   |        |     | (3)   |        |     | (4)   |        |     |
|-----------------------------------|-------|--------|-----|-------|--------|-----|-------|--------|-----|-------|--------|-----|
| Focal Variables                   |       |        |     |       |        |     |       |        |     |       |        |     |
| Black                             | .110  | (.054) | *   | .159  | (.076) | *   | -.136 | (.096) |     | -.085 | (.141) |     |
| GSS (scale)                       | -.003 | (.003) |     | -.002 | (.004) |     |       |        |     |       |        |     |
| Low (reference)                   |       |        |     |       |        |     |       |        |     |       |        |     |
| Middle                            |       |        |     |       |        |     | .011  | (.087) |     | -.014 | (.085) |     |
| High                              |       |        |     |       |        |     | -.004 | (.079) |     | .027  | (.093) |     |
| Interactions [Black ×...]         |       |        |     |       |        |     |       |        |     |       |        |     |
| GSS (scale)                       | .016  | (.004) | *** | .013  | (.004) | **  |       |        |     |       |        |     |
| Low (reference)                   |       |        |     |       |        |     |       |        |     |       |        |     |
| Middle                            |       |        |     |       |        |     | .231  | (.151) |     | .256  | (.164) |     |
| High                              |       |        |     |       |        |     | .406  | (.117) | **  | .379  | (.129) | **  |
| Covariates                        |       |        |     |       |        |     |       |        |     |       |        |     |
| Age                               |       |        |     | -.006 | (.003) |     |       |        |     | -.006 | (.004) |     |
| Female                            |       |        |     | -.207 | (.056) | *** |       |        |     | -.213 | (.057) | *** |
| Childhood financial hardship      |       |        |     | -.047 | (.034) |     |       |        |     | -.044 | (.034) |     |
| Parental education                |       |        |     | -.017 | (.015) |     |       |        |     | -.017 | (.015) |     |
| Major life events                 |       |        |     | .001  | (.007) |     |       |        |     | .001  | (.007) |     |
| Lifetime psychiatric disorders    |       |        |     | -.068 | (.034) | *   |       |        |     | -.074 | (.034) | *   |
| Married                           |       |        |     | .008  | (.069) |     |       |        |     | .008  | (.069) |     |
| Education                         |       |        |     | -.010 | (.011) |     |       |        |     | -.011 | (.011) |     |
| Financial resources               |       |        |     | .026  | (.046) |     |       |        |     | .033  | (.048) |     |
| Employed full-time                |       |        |     | .141  | (.089) |     |       |        |     | .135  | (.089) |     |
| Employed part-time                |       |        |     | .206  | (.120) |     |       |        |     | .199  | (.121) |     |
| Retired                           |       |        |     | .215  | (.178) |     |       |        |     | .211  | (.171) |     |
| Other employment status           |       |        |     | .086  | (.159) |     |       |        |     | .085  | (.159) |     |
| Major discrimination              |       |        |     | .006  | (.026) |     |       |        |     | .008  | (.025) |     |
| Daily discrimination              |       |        |     | .070  | (.053) |     |       |        |     | .070  | (.054) |     |
| Obese                             |       |        |     | -.038 | (.060) |     |       |        |     | -.046 | (.060) |     |
| Smoker                            |       |        |     | -.059 | (.081) |     |       |        |     | -.061 | (.080) |     |
| Heavy drinker                     |       |        |     | -.112 | (.113) |     |       |        |     | -.120 | (.114) |     |
| 12-hour urine collection end time |       |        |     | .000  | (.000) | *** |       |        |     | .000  | (.000) | *** |
| Takes blood pressure medications  |       |        |     | -.308 | (.074) | *** |       |        |     | -.313 | (.074) | *** |
| Did not fast before collection    |       |        |     | -.174 | (.182) |     |       |        |     | -.114 | (.191) |     |
| Intercept                         | 1.993 | (.034) | *** | 1.916 | (.307) | *** | 1.992 | (.057) | *** | 1.924 | (.304) | *** |
| Adjusted R-squared                | .011  |        |     | .096  |        |     | .009  |        |     | .097  |        |     |

Notes: Unstandardized coefficients are reported with robust standard errors in parentheses. All estimates adjust for post-stratification weighting and clustering at the census block group level. GSS=goal-striving stress. Scaled GSS scores are mean-centered. Cortisol is in logged ug/L.

\* $p < .05$ , \*\* $p < .01$ , \*\*\* $p < .001$  (two-tailed).

**Table S6.** Robust linear regression estimates of DHEAS (n=1,252).

|                                  | (1)   |        |     | (2)   |        |     | (3)   |        |     | (4)   |        |     |
|----------------------------------|-------|--------|-----|-------|--------|-----|-------|--------|-----|-------|--------|-----|
| Focal Variables                  |       |        |     |       |        |     |       |        |     |       |        |     |
| Black                            | -.162 | (.052) | **  | -.170 | (.044) | *** | .008  | (.090) |     | -.021 | (.069) |     |
| GSS (scale)                      | .001  | (.003) |     | .000  | (.002) |     |       |        |     |       |        |     |
| Low (reference)                  |       |        |     |       |        |     |       |        |     |       |        |     |
| Middle                           |       |        |     |       |        |     | .225  | (.084) | **  | .028  | (.066) |     |
| High                             |       |        |     |       |        |     | .113  | (.092) |     | -.024 | (.076) |     |
| Interactions [Black ×...]        |       |        |     |       |        |     |       |        |     |       |        |     |
| GSS (scale)                      | .000  | (.004) |     | -.002 | (.003) |     |       |        |     |       |        |     |
| Low (reference)                  |       |        |     |       |        |     |       |        |     |       |        |     |
| Middle                           |       |        |     |       |        |     | -.254 | (.130) |     | -.197 | (.097) | *   |
| High                             |       |        |     |       |        |     | -.197 | (.150) |     | -.179 | (.089) | *   |
| Covariates                       |       |        |     |       |        |     |       |        |     |       |        |     |
| Age                              |       |        |     | -.027 | (.002) | *** |       |        |     | -.027 | (.002) | *** |
| Female                           |       |        |     | -.530 | (.044) | *** |       |        |     | -.526 | (.044) | *** |
| Childhood financial hardship     |       |        |     | -.021 | (.027) |     |       |        |     | -.022 | (.027) |     |
| Parental education               |       |        |     | .002  | (.010) |     |       |        |     | .002  | (.010) |     |
| Major life events                |       |        |     | -.004 | (.004) |     |       |        |     | -.004 | (.004) |     |
| Lifetime psychiatric disorders   |       |        |     | .007  | (.023) |     |       |        |     | .010  | (.023) |     |
| Married                          |       |        |     | -.015 | (.047) |     |       |        |     | -.015 | (.046) |     |
| Education                        |       |        |     | -.008 | (.011) |     |       |        |     | -.008 | (.011) |     |
| Financial resources              |       |        |     | .000  | (.034) |     |       |        |     | -.003 | (.034) |     |
| Employed full-time               |       |        |     | .164  | (.072) | *   |       |        |     | .162  | (.071) | *   |
| Employed part-time               |       |        |     | .189  | (.092) | *   |       |        |     | .192  | (.092) | *   |
| Retired                          |       |        |     | -.140 | (.128) |     |       |        |     | -.145 | (.128) |     |
| Other employment status          |       |        |     | .041  | (.124) |     |       |        |     | .042  | (.125) |     |
| Major discrimination             |       |        |     | -.019 | (.017) |     |       |        |     | -.019 | (.017) |     |
| Daily discrimination             |       |        |     | .011  | (.040) |     |       |        |     | .014  | (.040) |     |
| Obese                            |       |        |     | .099  | (.043) | *   |       |        |     | .102  | (.043) | *   |
| Smoker                           |       |        |     | .089  | (.053) |     |       |        |     | .088  | (.053) |     |
| Heavy drinker                    |       |        |     | .176  | (.073) | *   |       |        |     | .181  | (.072) | *   |
| Collection time                  |       |        |     | .000  | (.000) |     |       |        |     | .000  | (.000) | *   |
| Takes blood pressure medications |       |        |     | -.048 | (.049) |     |       |        |     | -.047 | (.049) |     |
| Did not fast before collection   |       |        |     | .073  | (.138) |     |       |        |     | .052  | (.136) |     |
| Intercept                        | 4.788 | (.033) | *** | 6.083 | (.270) | *** | 4.663 | (.064) | *** | 6.064 | (.292) | *** |
| Adjusted R-squared               | .007  |        |     | .403  |        |     | .018  |        |     | .405  |        |     |

Notes: Unstandardized coefficients are reported with robust standard errors in parentheses. All estimates adjust for post-stratification weighting and clustering at the census block group level. GSS=goal-striving stress. Scaled GSS scores are mean-centered. DHEAS = dehydroepiandrosterone sulfate. DHEAS is in logged ug/dL.

\* $p < .05$ , \*\* $p < .01$ , \*\*\* $p < .001$  (two-tailed).

**Table S7.** Robust linear regression estimates of cortisol:DHEAS ratio (n=1,252).

|                                   | (1)    |        |     | (2)    |        |     | (3)    |        |     | (4)    |        |     |
|-----------------------------------|--------|--------|-----|--------|--------|-----|--------|--------|-----|--------|--------|-----|
| Focal Variables                   |        |        |     |        |        |     |        |        |     |        |        |     |
| Black                             | .271   | (.065) | *** | .332   | (.077) | *** | -.140  | (.146) |     | -.051  | (.150) |     |
| GSS (scale)                       | -.004  | (.005) |     | -.001  | (.004) |     |        |        |     |        |        |     |
| Low (reference)                   |        |        |     |        |        |     |        |        |     |        |        |     |
| Middle                            |        |        |     |        |        |     | -.214  | (.125) |     | -.036  | (.112) |     |
| High                              |        |        |     |        |        |     | -.117  | (.125) |     | .052   | (.123) |     |
| Interactions [Black ×...]         |        |        |     |        |        |     |        |        |     |        |        |     |
| GSS (scale)                       | .016   | (.005) | **  | .015   | (.005) | **  |        |        |     |        |        |     |
| Low (reference)                   |        |        |     |        |        |     |        |        |     |        |        |     |
| Middle                            |        |        |     |        |        |     | .478   | (.171) | **  | .434   | (.167) | *   |
| High                              |        |        |     |        |        |     | .596   | (.205) | **  | .552   | (.171) | **  |
| Covariates                        |        |        |     |        |        |     |        |        |     |        |        |     |
| Age                               |        |        |     | .021   | (.004) | *** |        |        |     | .022   | (.004) | *** |
| Female                            |        |        |     | .321   | (.070) | *** |        |        |     | .311   | (.071) | *** |
| Childhood financial hardship      |        |        |     | -.028  | (.039) |     |        |        |     | -.025  | (.040) |     |
| Parental education                |        |        |     | -.018  | (.017) |     |        |        |     | -.019  | (.017) |     |
| Major life events                 |        |        |     | .005   | (.008) |     |        |        |     | .004   | (.008) |     |
| Lifetime psychiatric disorders    |        |        |     | -.076  | (.041) |     |        |        |     | -.086  | (.041) | *   |
| Married                           |        |        |     | .019   | (.079) |     |        |        |     | .018   | (.079) |     |
| Education                         |        |        |     | -.004  | (.014) |     |        |        |     | -.004  | (.014) |     |
| Financial resources               |        |        |     | .030   | (.055) |     |        |        |     | .039   | (.058) |     |
| Employed full-time                |        |        |     | -.012  | (.113) |     |        |        |     | -.017  | (.112) |     |
| Employed part-time                |        |        |     | .023   | (.155) |     |        |        |     | .012   | (.154) |     |
| Retired                           |        |        |     | .362   | (.244) |     |        |        |     | .362   | (.236) |     |
| Other employment status           |        |        |     | .034   | (.157) |     |        |        |     | .032   | (.156) |     |
| Major discrimination              |        |        |     | .023   | (.032) |     |        |        |     | .025   | (.031) |     |
| Daily discrimination              |        |        |     | .062   | (.064) |     |        |        |     | .058   | (.064) |     |
| Obese                             |        |        |     | -.142  | (.072) |     |        |        |     | -.152  | (.072) | *   |
| Smoker                            |        |        |     | -.151  | (.095) |     |        |        |     | -.151  | (.093) |     |
| Heavy drinker                     |        |        |     | -.290  | (.128) | *   |        |        |     | -.302  | (.129) | *   |
| 12-hour urine collection end time |        |        |     | .000   | (.000) | *** |        |        |     | .000   | (.000) | *** |
| Takes blood pressure medications  |        |        |     | -.265  | (.085) | **  |        |        |     | -.271  | (.085) | **  |
| Did not fast before collection    |        |        |     | -.293  | (.183) |     |        |        |     | -.215  | (.192) |     |
| Intercept                         | -2.795 | (.043) | *** | -4.254 | (.376) | *** | -2.671 | (.087) | *** | -4.232 | (.395) | *** |
| Adjusted R-squared                | .018   |        |     | .154   |        |     | .024   |        |     | .160   |        |     |

Notes: Unstandardized coefficients are reported with robust standard errors in parentheses. All estimates adjust for post-stratification weighting and clustering at the census block group level. GSS=goal-striving stress. Scaled GSS scores are mean-centered. DHEAS = dehydroepiandrosterone sulfate. Cortisol:DHEAS ratio is in natural logarithmic form.

\* $p < .05$ , \*\* $p < .01$ , \*\*\* $p < .001$  (two-tailed).



**Table S8.** Robust linear regression estimates of systolic blood pressure (n=1,252).

|                                  | (1)     |         | (2)     |         |     | (3)     |         |     | (4)     |             |
|----------------------------------|---------|---------|---------|---------|-----|---------|---------|-----|---------|-------------|
| Focal Variables                  |         |         |         |         |     |         |         |     |         |             |
| Black                            | 5.960   | (1.301) | 3.234   | (1.098) | **  | 4.605   | (2.319) | *   | .138    | (2.029)     |
| GSS (scale)                      | .081    | (.053)  | .041    | (.056)  |     |         |         |     |         |             |
| Low (reference)                  |         |         |         |         |     |         |         |     |         |             |
| Middle                           |         |         |         |         |     | -3.082  | (1.595) |     | -1.854  | (1.398)     |
| High                             |         |         |         |         |     | .142    | (1.681) |     | -.509   | (1.587)     |
| Interactions [Black ×...]        |         |         |         |         |     |         |         |     |         |             |
| GSS (scale)                      | -.125   | (.075)  | -.024   | (.073)  |     |         |         |     |         |             |
| Low (reference)                  |         |         |         |         |     |         |         |     |         |             |
| Middle                           |         |         |         |         |     | 2.393   | (2.279) |     | 3.540   | (2.233)     |
| High                             |         |         |         |         |     | 1.121   | (2.431) |     | 4.254   | (2.428) †   |
| Covariates                       |         |         |         |         |     |         |         |     |         |             |
| Age                              |         |         | .232    | (.046)  | *** |         |         |     | .230    | (.046) ***  |
| Female                           |         |         | -4.206  | (1.014) | *** |         |         |     | -4.298  | (1.027) *** |
| Childhood financial hardship     |         |         | -.695   | (.553)  |     |         |         |     | -.719   | (.554)      |
| Parental education               |         |         | -.255   | (.184)  |     |         |         |     | -.271   | (.184)      |
| Major life events                |         |         | .030    | (.102)  |     |         |         |     | .037    | (.102)      |
| Lifetime psychiatric disorders   |         |         | -.620   | (.495)  |     |         |         |     | -.585   | (.484)      |
| Married                          |         |         | 1.304   | (1.086) |     |         |         |     | 1.257   | (1.078)     |
| Education                        |         |         | -.345   | (.166)  | *   |         |         |     | -.349   | (.172) *    |
| Financial resources              |         |         | -.975   | (.811)  |     |         |         |     | -1.143  | (.842)      |
| Employed full-time               |         |         | -.148   | (1.646) |     |         |         |     | -.082   | (1.655)     |
| Employed part-time               |         |         | .476    | (1.974) |     |         |         |     | .325    | (1.964)     |
| Retired                          |         |         | 1.955   | (2.736) |     |         |         |     | 2.068   | (2.699)     |
| Other employment status          |         |         | -2.808  | (2.546) |     |         |         |     | -3.041  | (2.528)     |
| Major discrimination             |         |         | -.085   | (.370)  |     |         |         |     | -.129   | (.362)      |
| Daily discrimination             |         |         | .416    | (.981)  |     |         |         |     | .332    | (.997)      |
| Obese                            |         |         | 5.517   | (1.038) | *** |         |         |     | 5.433   | (1.048) *** |
| Smoker                           |         |         | .726    | (1.211) |     |         |         |     | .746    | (1.216)     |
| Heavy drinker                    |         |         | 3.056   | (1.891) |     |         |         |     | 3.146   | (1.850)     |
| Takes blood pressure medications |         |         | 4.950   | (1.251) | *** |         |         |     | 4.929   | (1.244) *** |
| Did not fast before collection   |         |         | -4.047  | (3.527) |     |         |         |     | -3.761  | (3.390)     |
| Intercept                        | 119.865 | (.660)  | 115.534 | (4.635) | *** | 120.965 | (1.265) | *** | 116.950 | (4.774) *** |
| Adjusted R-squared               | .038    |         | .234    |         |     | .044    |         |     | .237    |             |

Notes: Unstandardized coefficients are reported with robust standard errors in parentheses. All estimates adjust for post-stratification weighting and clustering at the census block group level. GSS=goal-striving stress. Scaled GSS scores are mean-centered.

† $p < .10$ , \* $p < .05$ , \*\* $p < .01$ , \*\*\* $p < .001$  (two-tailed).

**Table S9.** Robust linear regression estimates of diastolic blood pressure (n=1,252).

|                                  | (1)    |        |     | (2)    |         |     | (3)    |         |     | (4)    |             |  |
|----------------------------------|--------|--------|-----|--------|---------|-----|--------|---------|-----|--------|-------------|--|
| Focal Variables                  |        |        |     |        |         |     |        |         |     |        |             |  |
| Black                            | 3.686  | (.746) | *** | 2.020  | (.835)  | *   | 2.440  | (1.076) | *   | .024   | (1.194)     |  |
| GSS (scale)                      | .055   | (.038) |     | .018   | (.039)  |     |        |         |     |        |             |  |
| Low (reference)                  |        |        |     |        |         |     |        |         |     |        |             |  |
| Middle                           |        |        |     |        |         |     | .262   | (1.030) |     | .213   | (.993)      |  |
| High                             |        |        |     |        |         |     | 1.181  | (.960)  |     | .069   | (1.022)     |  |
| Interactions [Black ×...]        |        |        |     |        |         |     |        |         |     |        |             |  |
| GSS (scale)                      | -.002  | (.059) |     | .035   | (.054)  |     |        |         |     |        |             |  |
| Low (reference)                  |        |        |     |        |         |     |        |         |     |        |             |  |
| Middle                           |        |        |     |        |         |     | 1.260  | (1.583) |     | 1.953  | (1.601)     |  |
| High                             |        |        |     |        |         |     | 1.838  | (1.477) |     | 3.145  | (1.521) *   |  |
| Covariates                       |        |        |     |        |         |     |        |         |     |        |             |  |
| Age                              |        |        |     | .005   | (.030)  |     |        |         |     | .009   | (.031)      |  |
| Female                           |        |        |     | -4.215 | (.612)  | *** |        |         |     | -4.283 | (.616) ***  |  |
| Childhood financial hardship     |        |        |     | -.380  | (.350)  |     |        |         |     | -.388  | (.351)      |  |
| Parental education               |        |        |     | -.131  | (.115)  |     |        |         |     | -.136  | (.115)      |  |
| Major life events                |        |        |     | -.056  | (.071)  |     |        |         |     | -.056  | (.071)      |  |
| Lifetime psychiatric disorders   |        |        |     | -.055  | (.366)  |     |        |         |     | -.022  | (.362)      |  |
| Married                          |        |        |     | .623   | (.701)  |     |        |         |     | .649   | (.697)      |  |
| Education                        |        |        |     | -.116  | (.112)  |     |        |         |     | -.126  | (.111)      |  |
| Financial resources              |        |        |     | -.423  | (.541)  |     |        |         |     | -.459  | (.571)      |  |
| Employed full-time               |        |        |     | -.238  | (.879)  |     |        |         |     | -.325  | (.870)      |  |
| Employed part-time               |        |        |     | -.278  | (1.162) |     |        |         |     | -.329  | (1.159)     |  |
| Retired                          |        |        |     | -.898  | (1.710) |     |        |         |     | -.814  | (1.706)     |  |
| Other employment status          |        |        |     | -1.597 | (1.609) |     |        |         |     | -1.689 | (1.581)     |  |
| Major discrimination             |        |        |     | .771   | (.314)  | *   |        |         |     | .784   | (.304) *    |  |
| Daily discrimination             |        |        |     | .590   | (.676)  |     |        |         |     | .571   | (.670)      |  |
| Obese                            |        |        |     | 3.829  | (.633)  | *** |        |         |     | 3.780  | (.628) ***  |  |
| Smoker                           |        |        |     | -.438  | (.807)  |     |        |         |     | -.420  | (.799)      |  |
| Heavy drinker                    |        |        |     | 3.820  | (1.250) | **  |        |         |     | 3.808  | (1.229) **  |  |
| Takes blood pressure medications |        |        |     | 2.910  | (.848)  | **  |        |         |     | 2.895  | (.842) **   |  |
| Did not fast before collection   |        |        |     | -4.211 | (2.514) |     |        |         |     | -3.999 | (2.329)     |  |
| Intercept                        | 76.522 | (.426) | *** | 78.411 | (3.078) | *** | 76.002 | (.738)  | *** | 78.408 | (3.184) *** |  |
| Adjusted R-squared               | .036   |        |     | .194   |         |     | .036   |         |     | .196   |             |  |

Notes: Unstandardized coefficients are reported with robust standard errors in parentheses. All estimates adjust for post-stratification weighting and clustering at the census block group level. GSS=goal-striving stress. Scaled GSS scores are mean-centered.

\* $p < .05$ , \*\* $p < .01$ , \*\*\* $p < .001$  (two-tailed).

**Table S10.** Distributional properties of stress hormone variables.

|                        | Mean   | SD     | Min.  | Max.   | Skewness | Kurtosis | Kolmogorov-Smirnov |     | N     |
|------------------------|--------|--------|-------|--------|----------|----------|--------------------|-----|-------|
| <b>Non-transformed</b> |        |        |       |        |          |          |                    |     |       |
| Cortisol (ug/L)        | 10.91  | 11.41  | 1.00  | 194.00 | 4.22     | 36.91    | .17                | *** | 1,159 |
| DHEAS (ug/dL)          | 149.18 | 105.47 | 15.00 | 868.00 | 1.71     | 8.01     | .13                | *** | 1,140 |
| Cortisol:DHEAS ratio   | .12    | .18    | .00   | 2.56   | 6.26     | 63.42    | .26                | *** | 1,090 |
| <b>Log-transformed</b> |        |        |       |        |          |          |                    |     |       |
| Cortisol (ug/L)        | 2.03   | .84    | .00   | 5.27   | .10      | 2.80     | .03                |     | 1,159 |
| DHEAS (ug/dL)          | 4.76   | .74    | 2.71  | 6.77   | -.37     | 2.76     | .04                | *   | 1,140 |
| Cortisol:DHEAS ratio   | -2.71  | 1.04   | -5.85 | .94    | .12      | 3.04     | .03                |     | 1,090 |

Note: Statistics were derived from non-imputed data.

\* $p < .05$ , \*\*\* $p < .001$ .

**Table S11.** Average marginal predictions of hormone levels by race and GSS grouping (n=1,252).

|                   | Cortisol (ug/L) | DHEAS (ug/dL) | Cortisol:DHEAS ratio |
|-------------------|-----------------|---------------|----------------------|
| White, low GSS    | 7.22            | 120.09        | .06                  |
| White, middle GSS | 7.12            | 123.51        | .06                  |
| White, high GSS   | 7.42            | 117.88        | .06                  |
| Black, low GSS    | 6.63            | 116.58        | .06                  |
| Black, middle GSS | 8.45            | 99.03         | .09                  |
| Black, high GSS   | 9.96            | 95.47         | .10                  |

Notes: Estimates adjust for post-stratification weighting and clustering at the census block group level.

Covariates and biomarker controls are held at their respective means.
